# Supplementary material for: Electrochemical lithium-ion storage properties of quinone molecules encapsulated in single-walled carbon nanotubes
Source: Royal Society of Chemistry journal article supplement (doi:10.1039/c6cp01103a), 2016-01-01
Supplement: c6cp01103a1.pdf [file c6cp01103a1.pdf]

Electronic Supplementary Information

# Electrochemical lithium storage properties of quinone molecules encapsulated in single-walled carbon nanotubes

Yosuke Ishii\*, Kosuke Tashiro, Kento Hosoe, Ayar Al-zubaidi, and Shinji Kawasaki\*

Department of Materials Science and Engineering, Nagoya Institute of Technology, Gokiso-cho,  
Showa-ku, Nagoya 466-8555, Japan.

\*E-mail: [ishii.yosuke@nitech.ac.jp](mailto:ishii.yosuke@nitech.ac.jp), [Kawasaki.shinji@nitech.ac.jp](mailto:Kawasaki.shinji@nitech.ac.jp); Tel/Fax: +81-52-735-5221

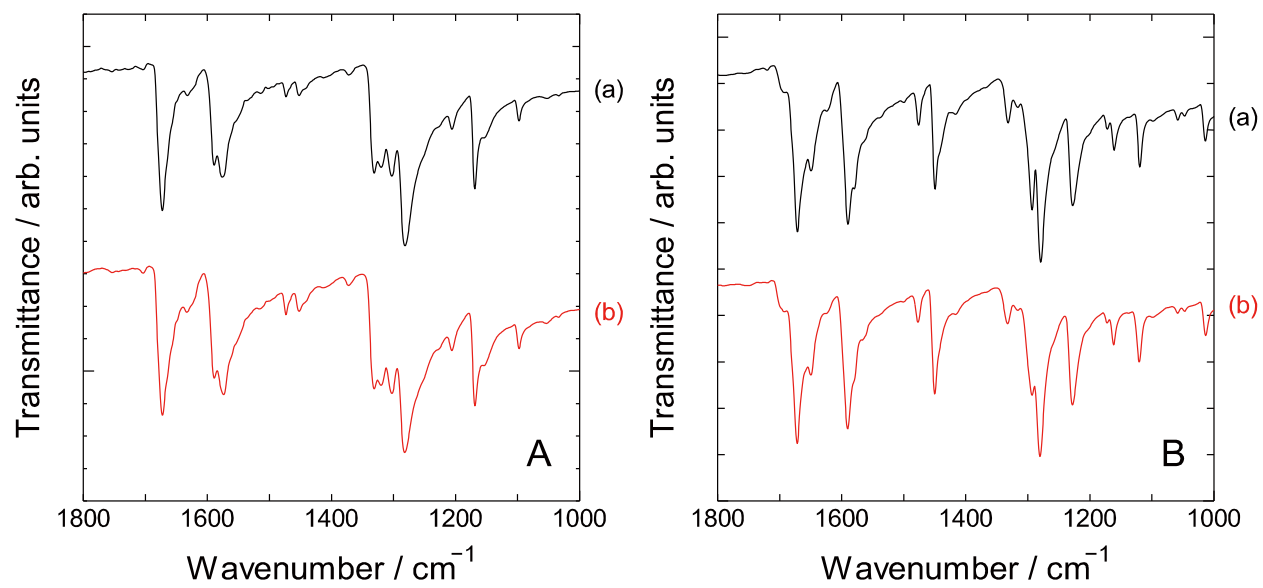

**Figure S1.** FT-IR spectra of (A) AQ and (B) PhQ, (a) before and (b) after the heat treatment at 200°C.

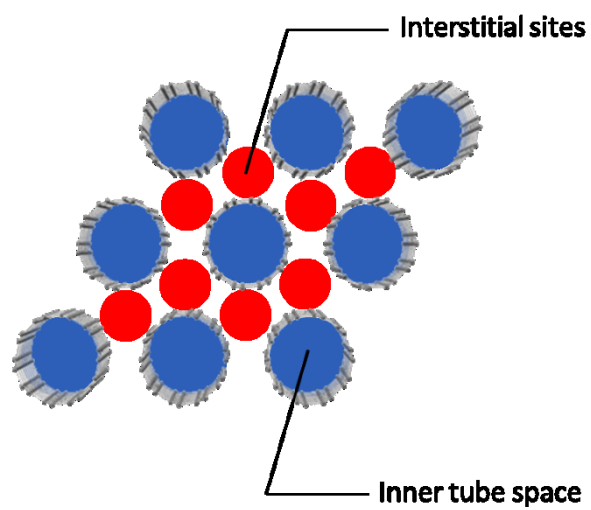

**Figure S2.** Structure of the bundled SWCNTs.

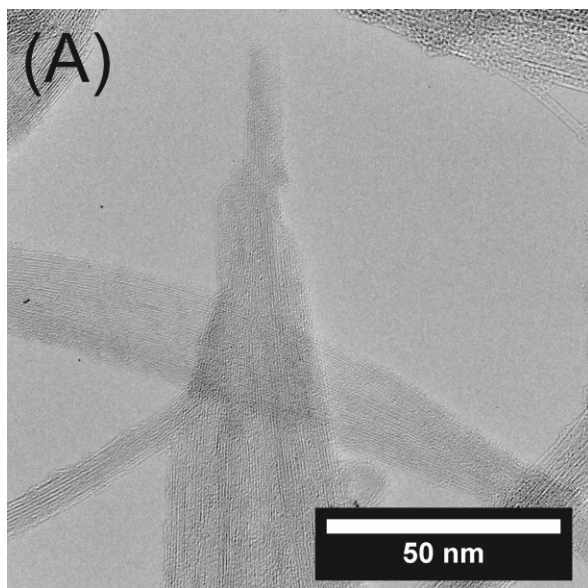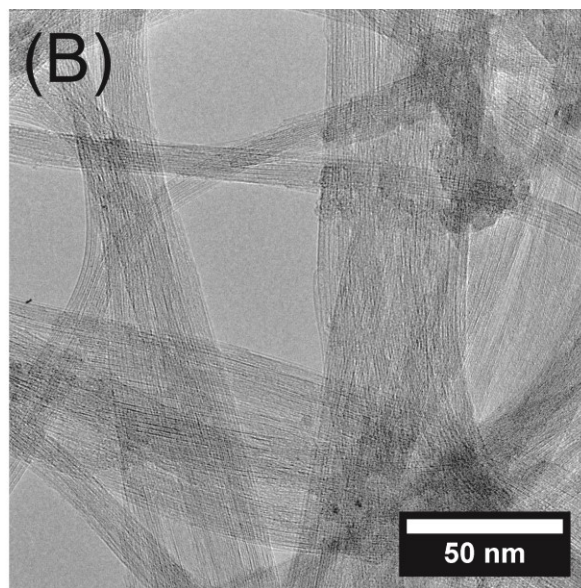

**Figure S3.** TEM images of (A) AQ@SWCNTs and (B) PhQ@SWCNTs.
